# Supplementary material for: Nitrogen dioxide levels estimated from land use regression models several years apart and association with mortality in a large cohort study
Source: Springer Nature journal article supplement (doi:10.1186/1476-069x-11-48), 2012-07-18

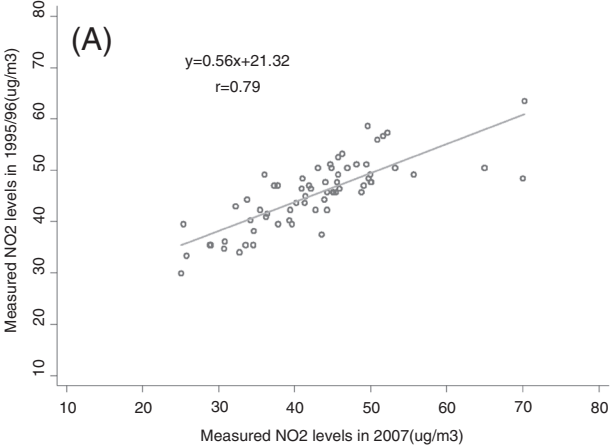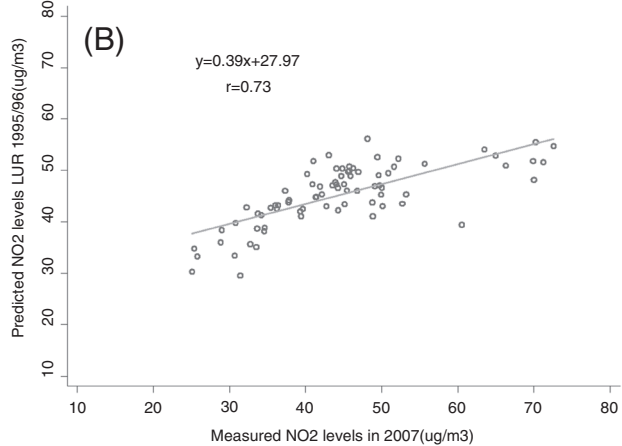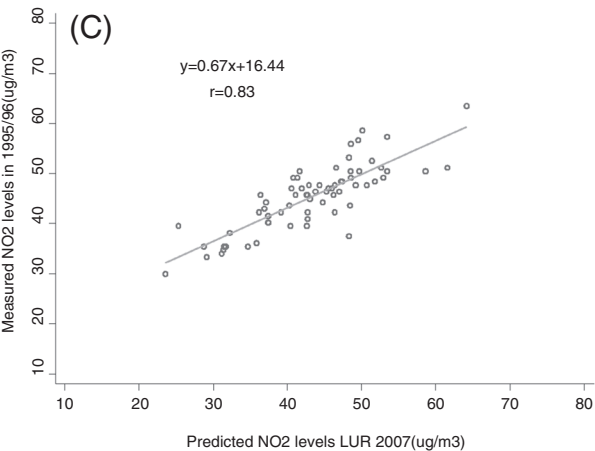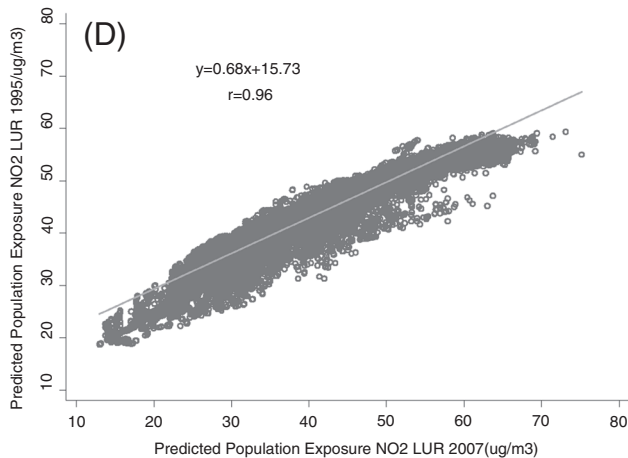

Supplement: 12940_2012_553_MOESM3_ESM.pdf [file 12940_2012_553_MOESM3_ESM.pdf]
