# Supplementary material for: Nitrogen dioxide levels estimated from land use regression models several years apart and association with mortality in a large cohort study
Source: Springer Nature journal article supplement (doi:10.1186/1476-069x-11-48), 2012-07-18
Supplement: 12940_2012_553_MOESM4_ESM.pdf [file 12940_2012_553_MOESM4_ESM.pdf]

# 1995/1996

## Legend

— River

### Estimated NO<sub>2</sub> 1995/1996

Value

High : 60,0

Low : 20,0

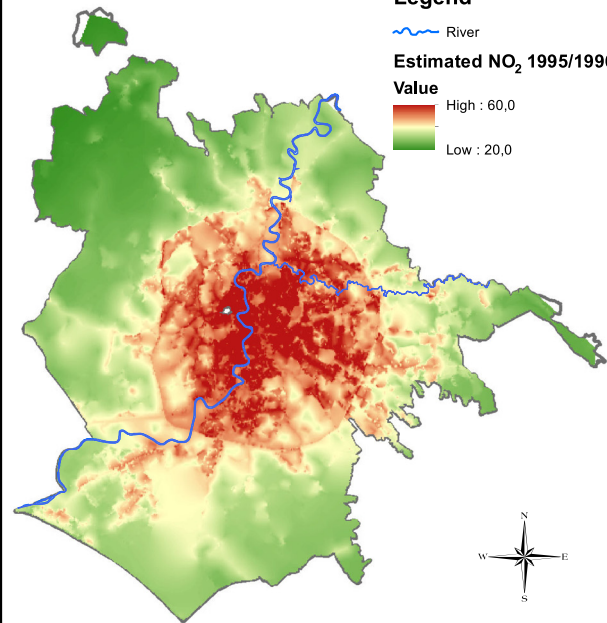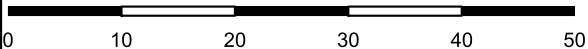

Kilometers

# 2007

## Legend

— River

### Estimated NO<sub>2</sub> 2007

Value

High : 60,0

Low : 20,0

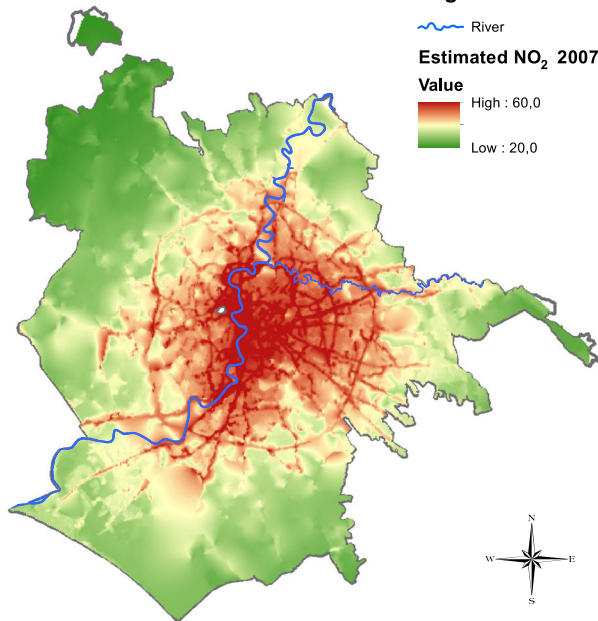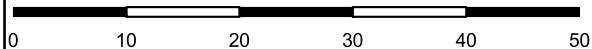

Kilometers
